# Supplementary material for: Genetic analysis of the clonal stability of Chinese hamster ovary cells for recombinant protein production
Source: Royal Society of Chemistry journal article supplement (doi:10.1039/c5mb00627a), 2015-11-06
Supplement: c5mb00627a1.pdf [file c5mb00627a1.pdf]

Table S1 Enriched biological process terms of gene ontology

| Comparison                                                    | Regulation | Number of regulated genes | Functional Cluster               |                  | Gene ontology class                                        | Number of regulated genes in GO class | Enrichment P-value                  | Regulated genes in Functional Cluster |
|---------------------------------------------------------------|------------|---------------------------|----------------------------------|------------------|------------------------------------------------------------|---------------------------------------|-------------------------------------|---------------------------------------|
|                                                               |            |                           | ID                               | Enrichment score |                                                            |                                       |                                     |                                       |
| B19A6-S-14 vs. B19A6-S-41                                     | Up         | 2                         | ---                              | ---              | ---                                                        | ---                                   | ---                                 | ---                                   |
|                                                               | Down       | 11                        | ---                              | ---              | ---                                                        | ---                                   | ---                                 | ---                                   |
|                                                               | Up         | 12                        | ---                              | ---              | ---                                                        | ---                                   | ---                                 | ---                                   |
| B19A6-U-13 VS B19A6-U-39                                      | Down       | 104                       | 1                                | 1.79             | sterol metabolic process                                   | 5                                     | 0.0012                              |                                       |
|                                                               |            |                           |                                  |                  | cholesterol metabolic process                              | 4                                     | 0.0090                              | Abca1, Nsdhl,                         |
|                                                               |            |                           |                                  |                  | sterol biosynthetic process                                | 3                                     | 0.0140                              | Aldh1a1, Cat,                         |
|                                                               |            |                           |                                  |                  | steroid metabolic process                                  | 5                                     | 0.0170                              | Ppap2a, Hmgcs1,                       |
|                                                               |            |                           |                                  |                  | steroid biosynthetic process                               | 3                                     | 0.0700                              | Sc5d                                  |
|                                                               |            |                           |                                  |                  | lipid biosynthetic process                                 | 5                                     | 0.0970                              |                                       |
|                                                               |            |                           | 2                                | 1.33             | macromolecule catabolic process                            | 10                                    | 0.0180                              |                                       |
|                                                               |            |                           |                                  |                  | protein catabolic process                                  | 9                                     | 0.0200                              |                                       |
|                                                               |            |                           |                                  |                  | cellular macromolecule catabolic process                   | 9                                     | 0.0320                              | Cd36, Edem3, Ranbp2,                  |
|                                                               |            |                           |                                  |                  | proteolysis involved in cellular protein catabolic process | 8                                     | 0.0440                              | Adam10, Cast, C3,                     |
|                                                               |            |                           |                                  |                  | cellular protein catabolic process                         | 8                                     | 0.0460                              | Mmp19, Metap2,                        |
|                                                               |            |                           |                                  |                  | ubiquitin-dependent protein catabolic process              | 4                                     | 0.0550                              | Pja2, Pias2, Ubr2,                    |
|                                                               |            |                           |                                  |                  | modification-dependent macromolecule catabolic process     | 7                                     | 0.0900                              | Ubr3, Usp32                           |
|                                                               |            |                           |                                  |                  | modification-dependent protein catabolic process           | 7                                     | 0.0900                              |                                       |
|                                                               |            |                           |                                  |                  | proteolysis                                                | 11                                    | 0.0980                              |                                       |
|                                                               |            |                           |                                  |                  | 3                                                          | 1.32                                  | glycosaminoglycan metabolic process | 3                                     |
|                                                               |            |                           | aminoglycan metabolic process    | 3                |                                                            |                                       | 0.0400                              | Chst12, Dcn, Gns                      |
|                                                               |            |                           | polysaccharide metabolic process | 3                |                                                            |                                       | 0.1100                              |                                       |
|                                                               |            |                           | 4                                | 1.2              | mRNA transport                                             | 3                                     | 0.0550                              |                                       |
|                                                               |            |                           |                                  |                  | establishment of RNA localization                          | 3                                     | 0.0620                              |                                       |
| RNA transport                                                 | 3          | 0.0620                    |                                  |                  | G3bp2, Ranbp2,                                             |                                       |                                     |                                       |
| nucleic acid transport                                        | 3          | 0.0620                    |                                  |                  | Nxf7                                                       |                                       |                                     |                                       |
| RNA localization                                              | 3          | 0.0630                    |                                  |                  |                                                            |                                       |                                     |                                       |
| nucleobase, nucleoside, nucleotide and nucleic acid transport | 3          | 0.0750                    |                                  |                  |                                                            |                                       |                                     |                                       |

Table S2. Enriched KEGG pathways

| Comparison                | Regulation | Number of regulated genes | KEGG pathway                               | Number of regulated genes in pathway | Enrichment P-value |
|---------------------------|------------|---------------------------|--------------------------------------------|--------------------------------------|--------------------|
| B19A6-S-14 vs. B19A6-S-41 | Up         | 2                         | ---                                        | ---                                  | ---                |
|                           | Down       | 11                        | ---                                        | ---                                  | ---                |
| B19A6-U-13 vs. B19A6-U-39 | Up         | 12                        | ---                                        | ---                                  | ---                |
|                           | Down       | 104                       | Fatty acid metabolism                      | 5                                    | 0.00034            |
|                           |            |                           | Steroid biosynthesis                       | 3                                    | 0.0021             |
|                           |            |                           | Drug metabolism - cytochrome P450          | 4                                    | 0.0026             |
|                           |            |                           | Fat digestion and absorption               | 3                                    | 0.0037             |
|                           |            |                           | Valine, leucine and isoleucine degradation | 4                                    | 0.0050             |
|                           |            |                           | Tryptophan metabolism                      | 3                                    | 0.0052             |

Figure S1

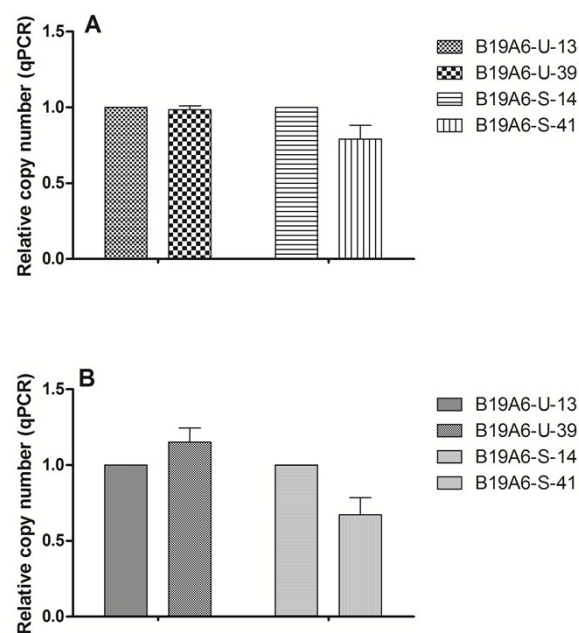

Fig. S1 Relative gene copy number of the unstable cell line (B19A6-U-13 and B19A6-U-39) and the stable cell line (B19A6-S-14 and B19A6-S-41). GAPDH was used for normalization (a).  $\beta$ -actin was used for normalization (b)

Figure S2

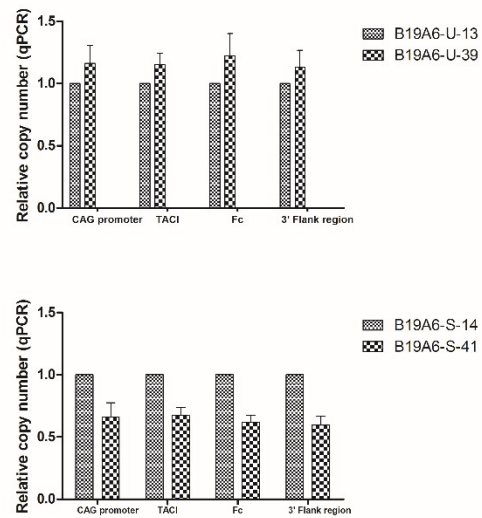

Fig. S2 Changes in of gene copy number of the CAG promoter, TACI, Fc and downstream flanking sequence of Fc in high generation cells relative to low generation cells.  $\beta$  - actin was used for normalization.
